# Supplementary material
Source: Springer Nature journal article supplement (https://www.springermedizin.de/resource/supplementary/13058_2011_2901_MOESM9_ESM.pdf/9702820)

**A****HBC-12B patient**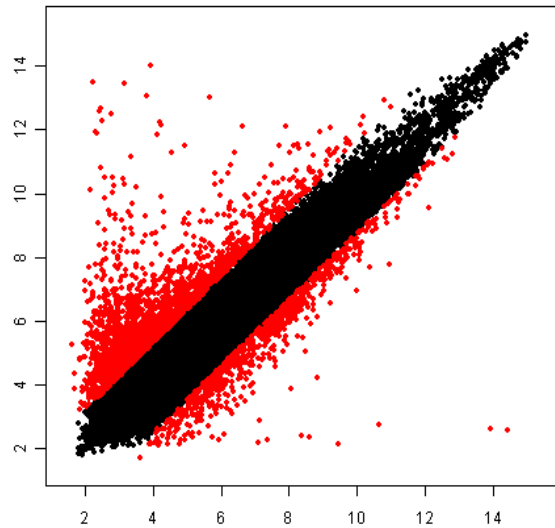**HBCx-12B xenograft P3****B****HBCx-12B xenograft P6**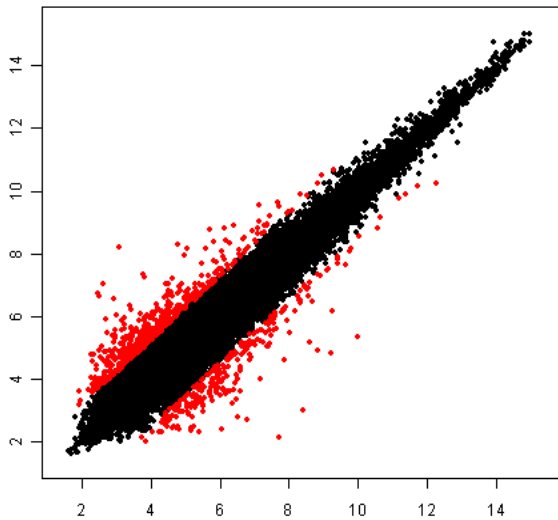**HBCx-12B xenograft P3****C**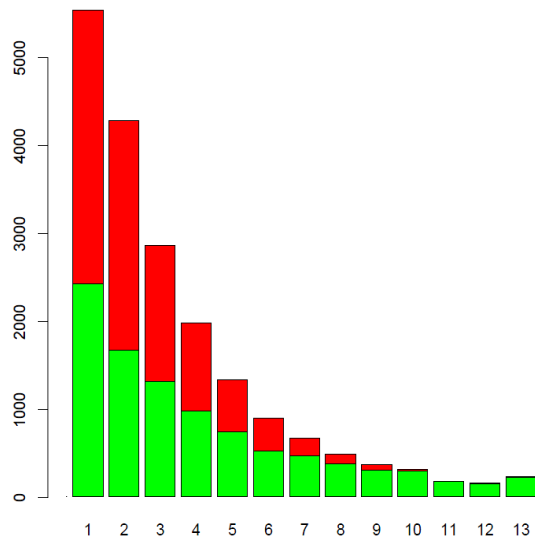**Number of pairs**

Supplement: MOESM9 [file 9702820]
